# Supplementary material for: Allosteric modulation of the CXCR4:CXCL12 axis by targeting receptor nanoclustering via the TMV-TMVI domain
Source: eLife journal article supplement (doi:10.7554/elife.93968), 2024-02-14
Supplement: fig3-figsupp2-data1 [file elife-93968-fig3-figsupp2-data1-v1.zip]

**pErk**

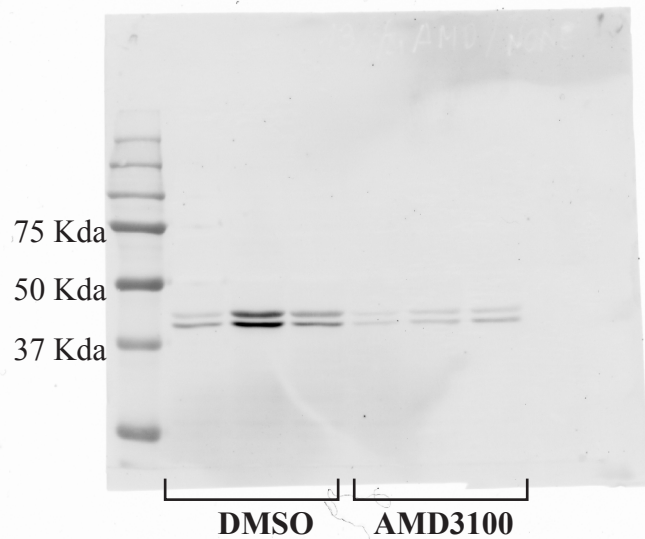

**pErk + pAkt**

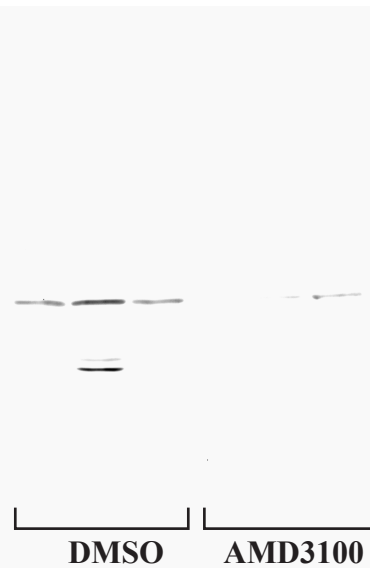

**pErk + pAkt + Akt**

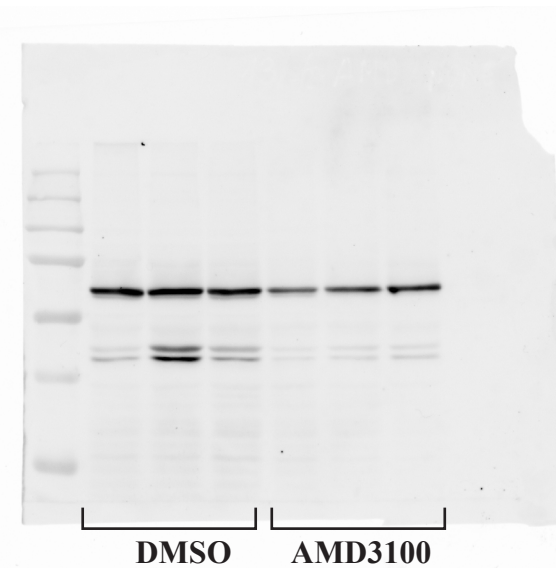

**Figure 3, Figure supplement 2, Source Data 1.** Original membranes corresponding to Figure supplement 2. First three lanes correspond to DMSO-treated cells and lanes 4, 5 and 6 to cells treated with AMD-3100. All blue molecular weight markers were employed.
